# Supplementary material
Source: Springer Nature journal article supplement (https://www.springermedizin.de/resource/supplementary/12889_2012_4936_MOESM6_ESM.pdf/9493046)

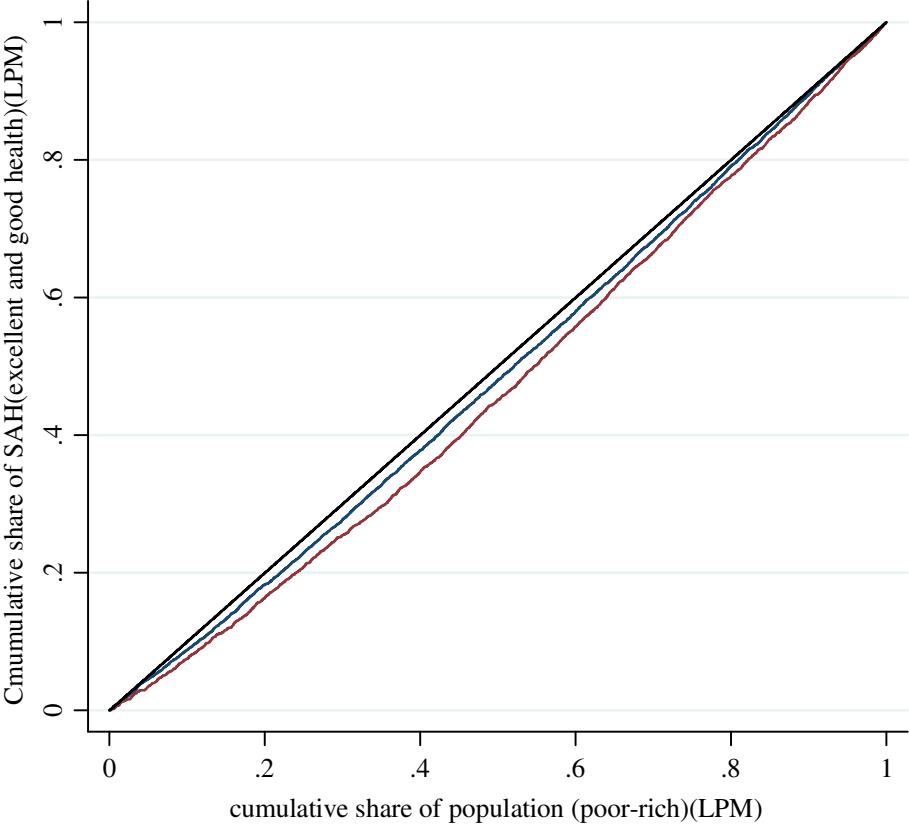

— rural — urban — line of equality

Supplement: MOESM6 [file 9493046]
